# Supplementary material
Source: HighWire-hosted journal article supplement (https://jme.bmj.com/content/47/1/51)
Supplement: inline-supplementary-material-2 [file inline-supplementary-material-2.pdf]

## **Appendix 2**

### **A) General Questions**

#### **Introductory Questions**

- a. Tell me about your professional history
  - i. When did you become interested in it and why?
  - ii. How did you pursue your profession, what motivated you?
  - iii. How would you describe your profession when you first started? How would you describe it now?
- b. Do you have a system of beliefs that help guide you in your practice?
  - i. Can you speak to the origins of these beliefs?
  - ii. How did they develop?
  - iii. Have they changed over time? If so, how and why?

#### **Main Questions**

- c. Have you ever received an informal request for assistance in dying before the legislature was produced?
  - i. What was your experience with that?
- d. Would you say you have observed intolerable suffering?
  - i. How would you diagnose this degree of suffering in a patient?
- e. What concerns you most about receiving a request for assistance in dying now?
  - i. What would be an effective means of addressing these fears or concerns?
- f. What good do you hope will come from access to assisted dying for patients?
- g. Can you identify your moral position on assisted dying?
  - i. How has your position developed? Has it always been as you stated?
  - ii. What experiences led you to develop this position?
- h. Has assisted dying changed the way you view your professional role?
  - i. Do you think it has changed your relationship with colleagues?
  - ii. Do you think that has changed your relationship with patients?
  - iii. What was your relationship with patients like prior to assisted dying?
- i. How do you think assisted dying will shape your profession in the future?
- j. How far would you feel comfortable following a patient who makes a request for assistance in dying?
  - i. What barriers would you expect to encounter?
- k. Is there anything you wish to add?

#### **Additional Questions**

- l. One of the criteria required to be eligible for assisted dying is that the patient must be experiencing intolerable suffering.
  - i. What is your understanding of intolerable suffering?
  - ii. How would you diagnose intolerable suffering?
  - iii. What are the limits of medicine, in terms of treating suffering?

- m. What would you say, is the biggest risk (be it legal, social, etc) to you both personally and professionally when you are approached with a request for assistance in dying?
  - i. How will you minimize this perceived risk?
  - ii. Do you feel that the process of educating those entering your profession will be changed as a result of assisted dying?
  - iii. How do you think these changes will be addressed?
  - iv. How would you like to see it addressed?
- n. Is there anything else you wish to say?

**B) Additional questions for ADRAS**

- a. What were your thoughts and motivations when you first applied to be a part of ADRAS?
- b. What were some of your hopes and worries when your application was accepted?
- c. Do you perceive any risks associated with being a part of ADRAS?
- d. How do you think being part of ADRAS might affect your professional identity?
  - i. Does it affect how your colleagues see you?

**C) Follow-up interview questions**

- a. *What are your thoughts regarding the role of your profession now that you have participated directly in MAID?*
- b. *Looking back on your previous interview, do you feel differently about any of the questions I had asked or the answers you had given?*
