# Supplementary material
Source: HighWire-hosted journal article supplement (https://jme.bmj.com/content/47/1/51)
Supplement: inline-supplementary-material-3 [file inline-supplementary-material-3.pdf]

## **Appendix 2.1**

1.0 Reflecting specifically on your experience working on the ADRAS team, we'd like to ask you to share:

- What have been the highlights for you in the last year?
- What have been the low points for you in the last year?
- What things have surprised you?

2.0 When we did the survey and focus groups with [HEALTH ORGANIZATION] staff and physicians in 2015/16 before MAiD services were developed at [HEALTH ORGANIZATION], some key values were identified as being important. Based on your experience with the ADRAS team, please share your perceptions of how successful [HEALTH ORGANIZATION] has been in embedding these values into the operation of the MAiD program:

**Respect for moral diversity:** for professionals who choose to participate or not participate in the MAiD process; people are empowered to honor their moral conscience around this issue

**Protecting privacy and confidentiality:** of patients seeking MAiD, as well as MAiD providers

**Supporting patients through suffering by:** ensuring patients have access to good pain/symptom management/palliative care and attending to the of the patient

**Providing safe and high quality MAiD care for patients, families and healthcare providers by:** using evidence-informed practice, standardized protocols and procedures; providing education, resources and supports to health professionals caring for patients through the MAiD process

3.0 One of the goals of the program is to provide MAiD in a whole person care model. Whole person care means attending to the needs of whole patient (emotional/social/spiritual/physical need), while also caring for the patient's family, as well as the healthcare professionals surrounding that patient/family.

To what degree has the MAiD program been successful with applying a whole person care model? How could whole person care be improved in this program?

4.0 What do you think has been done well in the process of developing MAiD resources, services and practice at [HEALTH ORGANIZATION]?

Probes: for patients and families? For staff and physicians?

5.0 What are your primary concerns/worries about MAiD resources, services and practice at [HEALTH ORGANIZATION]?

Probes: for patients and families? For staff and physicians? Concerns and worries for the future?

6.0 What opportunities do you see to enhance your experience on the ADRAS team?

7.0 What could be done to help to make the ADRAS team sustainable?

8.0 What would you want other health care professionals to know about your experience on the ADRAS team?
